# Supplementary material
Source: PubMed Central journal article supplement (PMC6445708)

Table S1. Behavioral differences between speakers identified as having a morphosyntactic production deficit based on picture descriptions (PD-MR) and speakers who did not have such a deficit (PD-Other). Speakers whose output was not classifiable (PD-NC) are excluded from this table.

| Variable                         | PD-MR (n=12)<br>Mean (SD) | PD-Other (n=52)<br>Mean (SD) | <i>p</i> |
|----------------------------------|---------------------------|------------------------------|----------|
| WAB: AQ (0-100)                  | 59.6 (11.44)              | 84.88 (18.6)                 | <.001*   |
| WAB: Fluency (0-10)              | 4 (1.28)                  | 8.12 (2.31)                  | <.001*   |
| WAB: Spontaneous speech (0-20)   | 10.92 (1.98)              | 16.96 (3.73)                 | <.001*   |
| WAB: Aud. verb. comp. (0-10)     | 7.64 (1.58)               | 9.66 (2.85)                  | 0.021*   |
| WAB: Repetition (0-10)           | 5.19 (2.46)               | 8.06 (2.6)                   | 0.001*   |
| WAB: Naming, word finding (0-10) | 6.08 (2.1)                | 8.33 (2.26)                  | 0.003*   |
| ASRS: Aphasia severity           | 2.58 (1.08)               | 0.98 (0.99)                  | <.001*   |
| ASRS: AOS severity               | 1.64 (1.5)                | 0.51 (1.14)                  | 0.007*   |
| ASRS: Dysarthria severity        | 0.25 (0.45)               | 0.22 (0.64)                  | 0.862    |
| PD: Number of Words              | 53.44 (24.81)             | 156.27 (62.91)               | <.001*   |
| PD: Errors/Words                 | 0.2362 (0.1596)           | 0.0475 (0.0785)              | <.001*   |
| PD: MA errors/Words              | 0.0132 (0.0111)           | 0.0031 (0.0069)              | <.001*   |
| PD: MLU in Words                 | 3.76 (1.62)               | 7.88 (2.27)                  | <.001*   |
| PD: Type-Token Ratio             | 0.575 (0.139)             | 0.536 (0.059)                | 0.123    |
| PD: Words per minute             | 28.89 (12.25)             | 83.9 (32.01)                 | <.001*   |
| PD: Nouns/Words                  | 0.3034 (0.1073)           | 0.2298 (0.0503)              | 0.001*   |
| PD: Verbs/Words                  | 0.1639 (0.0659)           | 0.1844 (0.046)               | 0.208    |
| PD: Auxiliaries/Words            | 0.031 (0.0246)            | 0.0555 (0.0228)              | 0.002*   |
| PD: Prepositions/Words           | 0.0309 (0.0331)           | 0.0771 (0.0293)              | <.001*   |
| PD: Adjectives/Words             | 0.0255 (0.0166)           | 0.0305 (0.0152)              | 0.322    |
| PD: Adverbs/Words                | 0.0236 (0.0275)           | 0.055 (0.0291)               | 0.001*   |
| PD: Conjunctions/Words           | 0.0046 (0.0105)           | 0.0142 (0.0127)              | 0.018*   |
| PD: Determiners/Nouns            | 0.0882 (0.1218)           | 0.0869 (0.1421)              | 0.977    |
| PD: Pronouns/Words               | 0.0971 (0.0783)           | 0.1291 (0.055)               | 0.101    |
| PD: Nouns/Verbs                  | 2.39 (1.76)               | 1.36 (0.55)                  | 0.001*   |

Notes: PD-MR = Speech output rated as 'morphosyntactically reduced'; PD-Other = Speech output *not* rated as 'morphosyntactically reduced'; WAB = Western Aphasia Battery, Revised (Kertesz, 2007); AQ = Aphasia Quotient (overall aphasia severity); aud. verb. comp. = auditory verbal comprehension; ASRS = Apraxia of Speech Rating Scale (Strand, E. A., Duffy, J. R., Clark, H. M., & Josephs, K. (2014). The Apraxia of Speech Rating Scale: a tool for diagnosis and description of apraxia of speech. *Journal of Communication Disorders*, 51, 43-50.); PD = measures obtained from the Cookie-Theft picture description task; MA = morphological agreement; MLU = mean length of utterance; \*  $p < .05$

Figure S1

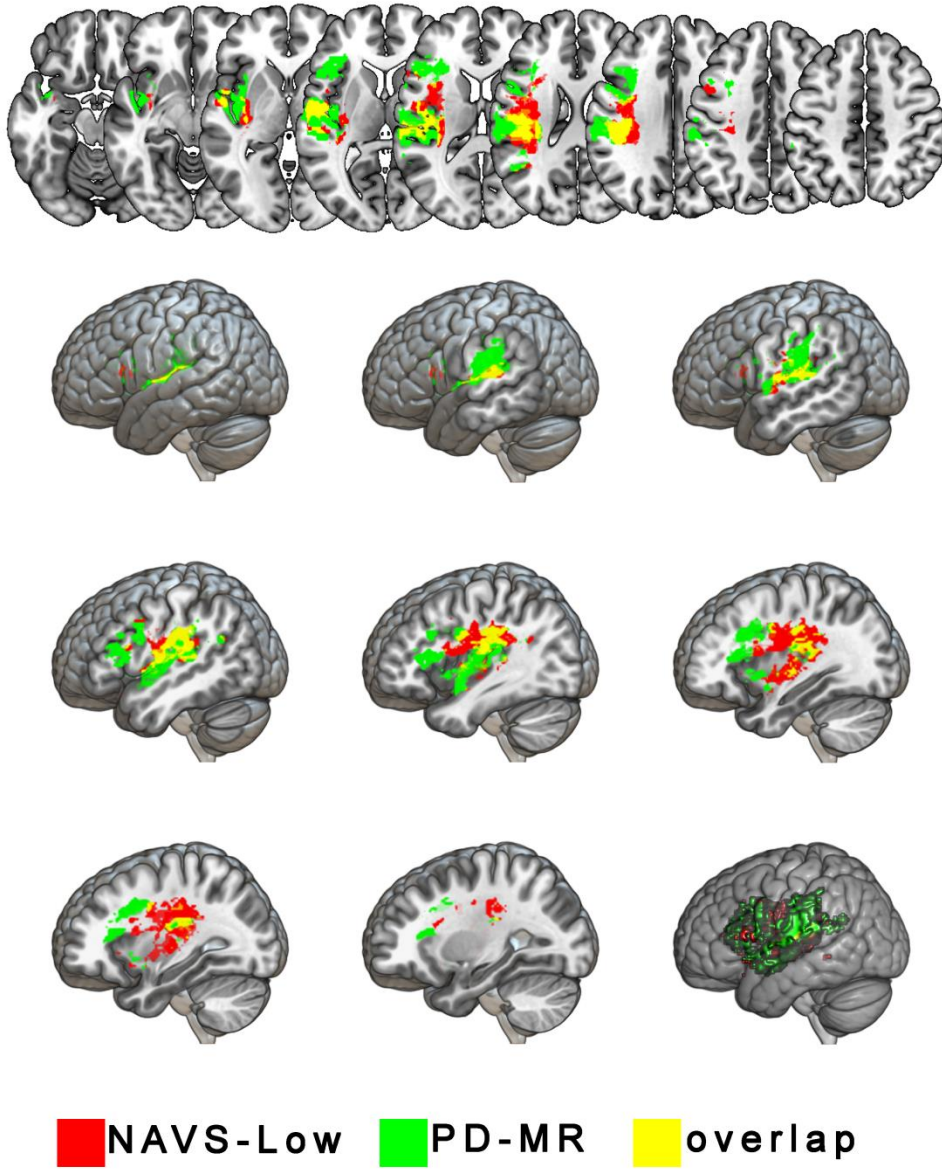

Figure S2

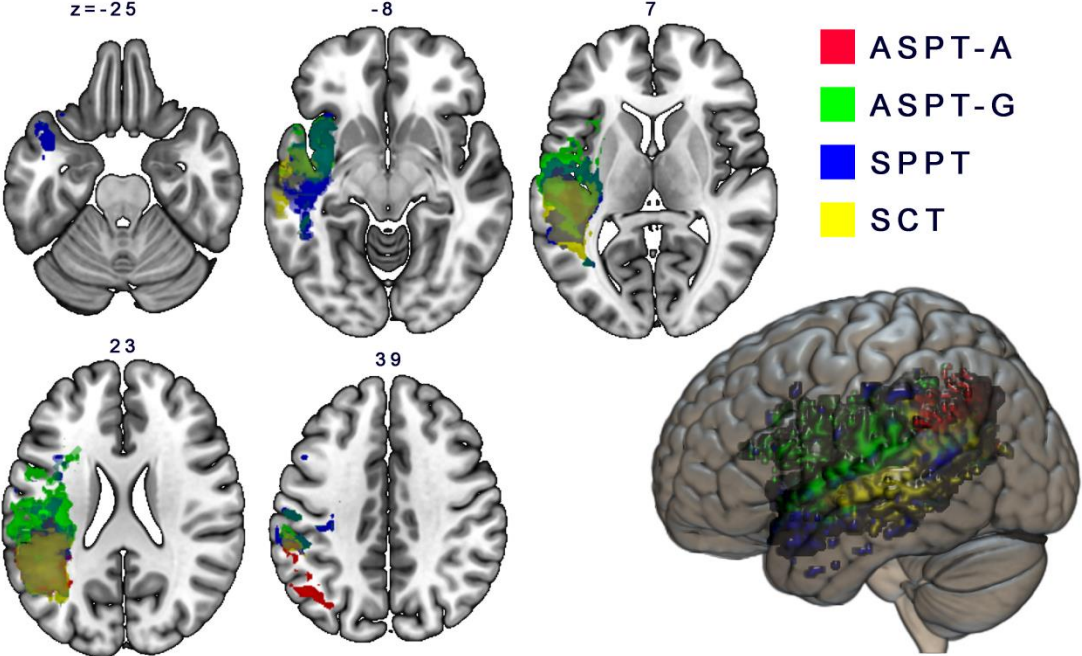

Supplement: NIHMS1012298-supplement-tables_figures.pdf [file NIHMS1012298-supplement-tables_figures.pdf]
